# Supplementary material for: The accuracy and promise of personal breathalysers for research: Steps toward a cost-effective reliable measure of alcohol intoxication?
Source: PubMed Central journal article supplement (PMC6001255; doi:10.1177/2055207617746752), 2017-12-20

*Supplementary Table 1.* Relation between drunk driving (+/- 0.05g/dl) between the police-grade and the personal breathalyser for participants who had consumed no alcohol within 15 minutes of the interview ( $n = 258$ ).

|                 |           | <b>Police-Grade</b> |           |              |
|-----------------|-----------|---------------------|-----------|--------------|
|                 |           | +0.05g/dl           | -0.05g/dl | <b>Total</b> |
| <b>Personal</b> | +0.05g/dl | 170                 | 12        | 182          |
|                 | -0.05g/dl | 1                   | 75        | 76           |
| <b>Total</b>    |           | 171                 | 87        | 258          |

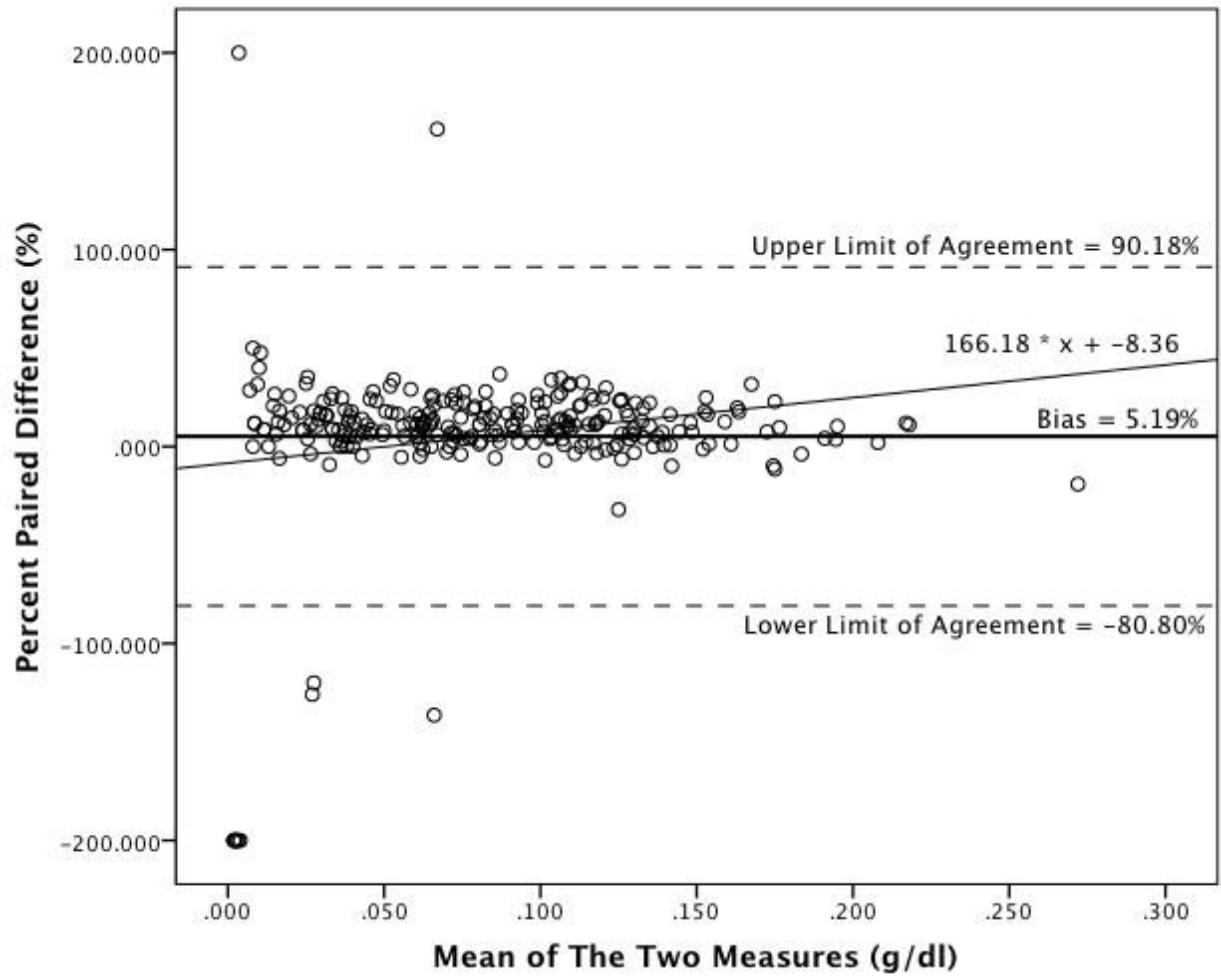

Supplement: Supplementary_Table_1_and_Figure_1.pdf [file Supplementary_Table_1_and_Figure_1.pdf]
